# Supplementary material for: Spotting d-band centers of single-atom catalysts by oxygen intermediate-boosted electrochemiluminescence
Source: Royal Society of Chemistry journal article supplement (doi:10.1039/d4sc03763d), 2024-01-01
Supplement: d4sc03763d1.pdf [file d4sc03763d1.pdf]

Supporting Information for

**Spotting d-band centers of single-atom catalysts by oxygen  
intermediate-boosted electrochemiluminescence**

Ruyu Xie,<sup>a</sup> Kaitao Li,<sup>ac</sup> Rui Tian,<sup>\*ac</sup> and Chao Lu<sup>\*abc</sup>

*<sup>a</sup>State Key Laboratory of Chemical Resource Engineering, Beijing University of Chemical  
Technology, Beijing, 100029, China*

*<sup>b</sup>Pingyuan Laboratory, College of Chemistry, Zhengzhou University, Zhengzhou, 450001, China*

*<sup>c</sup>Quzhou Institute for Innovation in Resource Chemical Engineering, Quzhou, 324000, China*

\*E-mail: tianrui@mail.buct.edu.cn; luchao@mail.buct.edu.cn

## Table of Contents

|                                                                                                                                                                                                                                                                                                 |     |
|-------------------------------------------------------------------------------------------------------------------------------------------------------------------------------------------------------------------------------------------------------------------------------------------------|-----|
| <b>Experimental Section</b>                                                                                                                                                                                                                                                                     | S4  |
| <b>Fig. S1</b> Cathodic ECL spectra at Ag <sup>s</sup> /LDH/ITO or Au <sup>s</sup> /LDH/ITO electrode in 0.01 mmol/L luminol.                                                                                                                                                                   | S10 |
| <b>Fig. S2</b> Current density-voltammetry curves in 0.01 mmol/L luminol at ITO, LDH/ITO, Au <sup>s</sup> /LDH/ITO and Ag <sup>s</sup> /LDH/ITO electrodes.                                                                                                                                     | S11 |
| <b>Fig. S3</b> XRD patterns of Ag <sup>np</sup> /LDH/ITO, Ag <sup>s</sup> /LDH/ITO and Ag <sup>np</sup> /ITO samples.                                                                                                                                                                           | S12 |
| <b>Fig. S4</b> UV-vis absorption spectra of LDH/ITO, Ag <sup>np</sup> /ITO, Ag <sup>np</sup> /LDH/ITO and Ag <sup>s</sup> /LDH/ITO samples.                                                                                                                                                     | S13 |
| <b>Fig. S5</b> XRD patterns of Au <sup>s</sup> /LDH/ITO, Au <sup>np</sup> /LDH/ITO and Au <sup>np</sup> /ITO samples.                                                                                                                                                                           | S14 |
| <b>Fig. S6</b> UV-vis absorption spectra of Au <sup>s</sup> /LDH/ITO, Au <sup>np</sup> /ITO, Au <sup>np</sup> /LDH/ITO and LDH/ITO samples.                                                                                                                                                     | S15 |
| <b>Fig. S7</b> SEM image of CoAl/LDH deposited on ITO electrode.                                                                                                                                                                                                                                | S16 |
| <b>Fig. S8</b> TEM images and the high-resolution TEM images of Ag <sup>np</sup> /LDH/ITO and Au <sup>np</sup> /LDH/ITO.                                                                                                                                                                        | S17 |
| <b>Fig. S9</b> XPS spectra of Al 2p for LDH/ITO, Ag <sup>np</sup> /LDH/ITO and Ag <sup>s</sup> /LDH/ITO.                                                                                                                                                                                        | S18 |
| <b>Fig. S10</b> XPS spectra of Al 2p for LDH/ITO, Au <sup>np</sup> /LDH/ITO and Au <sup>s</sup> /LDH/ITO.                                                                                                                                                                                       | S19 |
| <b>Fig. S11</b> ECL intensities at Ag <sup>s</sup> /LDH/ITO electrode in the absence or presence of <i>p</i> -BQ, IPA, and NaN <sub>3</sub> as radical scavengers, respectively.                                                                                                                | S20 |
| <b>Fig. S12</b> ECL intensities at Au <sup>s</sup> /LDH/ITO electrode in the absence or presence of <i>p</i> -BQ, IPA, and NaN <sub>3</sub> as radical scavengers, respectively.                                                                                                                | S21 |
| <b>Fig. S13</b> ECL intensities at Ag <sup>s</sup> /LDH/ITO and Au <sup>s</sup> /LDH/ITO electrodes in the absence or presence of <i>p</i> -BQ as radical scavengers, and UV-vis spectra of NBT for the Ag <sup>s</sup> /LDH/ITO and Au <sup>s</sup> /LDH/ITO electrodes in KOH/DMSO solutions. | S22 |
| <b>Fig. S14</b> EIS results for ITO, LDH/ITO, Au <sup>s</sup> /LDH/ITO and Ag <sup>s</sup> /LDH/ITO electrodes.                                                                                                                                                                                 | S23 |
| <b>Fig. S15</b> LSV curves of Ag <sup>s</sup> /LDH/ITO electrode in O <sub>2</sub> -saturated PBS solution at different rotation rates.                                                                                                                                                         | S24 |
| <b>Fig. S16</b> LSV curves of Au <sup>s</sup> /LDH/ITO electrode in O <sub>2</sub> -saturated PBS solution at different rotation rates.                                                                                                                                                         | S25 |
| <b>Fig. S17</b> XRD patterns of Cu <sup>s</sup> /LDH/ITO and LDH/ITO sample.                                                                                                                                                                                                                    | S26 |
| <b>Fig. S18</b> UV-vis absorption spectra of Cu <sup>s</sup> /LDH/ITO and LDH/ITO sample.                                                                                                                                                                                                       | S27 |
| <b>Fig. S19</b> HAADF-STEM image and STEM-EDS mapping images of Co, Al, and                                                                                                                                                                                                                     | S28 |

|                                                                                                                                                                                                                                |     |
|--------------------------------------------------------------------------------------------------------------------------------------------------------------------------------------------------------------------------------|-----|
| Cu for Cu <sup>s</sup> /LDH/ITO.                                                                                                                                                                                               |     |
| <b>Fig. S20</b> Ultraviolet photoelectron spectroscopy (UPS) valence-band spectra of Cu <sup>s</sup> /LDH/ITO.                                                                                                                 | S29 |
| <b>Fig. S21</b> (a) $I_{\text{ECL}}$ -intensities and (b) $I_{\text{ECL}}$ -potential curves for Cu <sup>s</sup> /LDH/ITO.                                                                                                     | S30 |
| <b>Fig. S22</b> XRD patterns of Fe <sup>s</sup> /LDH/ITO and LDH/ITO samples.                                                                                                                                                  | S31 |
| <b>Fig. S23</b> UV-vis absorption spectra of Fe <sup>s</sup> /LDH/ITO and LDH/ITO samples.                                                                                                                                     | S32 |
| <b>Fig. S24</b> HAADF-STEM image and STEM-EDS mapping images of Co, Al, and Fe for Fe <sup>s</sup> /LDH/ITO.                                                                                                                   | S33 |
| <b>Fig. S25</b> UPS valence-band spectra of Fe <sup>s</sup> /LDH/ITO.                                                                                                                                                          | S34 |
| <b>Fig. S26</b> (a) $I_{\text{ECL}}$ -intensities and (b) $I_{\text{ECL}}$ -potential curves for Fe <sup>s</sup> /LDH/ITO.                                                                                                     | S35 |
| <b>Fig. S27</b> Correlation between the d-band centers and ECL intensities of Ag <sup>s</sup> /LDH/ITO, Au <sup>s</sup> /LDH/ITO, Cu <sup>s</sup> /LDH/ITO and Fe <sup>s</sup> /LDH/ITO electrodes.                            | S36 |
| <b>Scheme S1</b> ECL mechanism of luminol catalyzed by the single-atom catalysts.                                                                                                                                              | S37 |
| <b>Table S1</b> Peak positions and Co <sup>3+</sup> /Co <sup>2+</sup> ratios of Co 2p in XPS spectra for LDH/ITO, Ag <sup>np</sup> /LDH/ITO, Au <sup>np</sup> /LDH/ITO, Ag <sup>s</sup> /LDH/ITO and Au <sup>s</sup> /LDH/ITO. | S38 |
| <b>Table S2</b> Information and calculation of the average oxidation states for Ag <sup>s</sup> /LDH/ITO and Au <sup>s</sup> /LDH/ITO.                                                                                         | S39 |
| <b>Table S3</b> Peak positions and relative contents of O 1s in XPS spectra for LDH/ITO, Ag <sup>s</sup> /LDH/ITO and Au <sup>s</sup> /LDH/ITO.                                                                                | S40 |
| <b>Table S4</b> ECL intensity variations of Au <sup>s</sup> /LDH/ITO and Ag <sup>s</sup> /LDH/ITO electrodes in the presence of different scavengers.                                                                          | S41 |
| <b>References</b>                                                                                                                                                                                                              | S42 |

## Experimental Section

**Materials.**  $\text{Co}(\text{NO}_3)_2 \cdot 6\text{H}_2\text{O}$  (analytical reagent),  $\text{NH}_4\text{F}$  (analytical reagent) and urea (chemical pure) were all acquired from Xilong Scientific Co. Ltd. (Guangdong, China).  $\text{Al}(\text{NO}_3)_3 \cdot 9\text{H}_2\text{O}$  (analytical reagent), HCl, dimethyl sulfoxide (DMSO), KOH (AR), and  $\text{Na}_2\text{HPO}_4$  (AR) were obtained from Beijing Reagent Company (Beijing, China).  $\text{NaH}_2\text{PO}_4$  (guaranteed reagent) was purchased from Tianjin Jinke Fine Chemical Research Institute (Tianjin, China).  $\text{NaN}_3$  (analytical reagent) was obtained from Fuchen Chemical Reagent Co., Ltd. (Tianjin, China). *p*-Benzoquinone (BQ, chemical pure) was supplied by Sinopharm Chemical Reagent Co., Ltd. (Shanghai, China). 2-Propanol (>99.7%) and isopropyl alcohol (IPA) (>99.7%) were acquired from Shanghai Tian Scientific Co., Ltd. (Shanghai, China). Indium tin oxide (ITO) electrodes (transmittance > 84%) were supplied by South China Science & Technology Company Limited (Shenzhen, China). Chloroauric acid tetrahydrate ( $\text{HAuCl}_4 \cdot x\text{H}_2\text{O}$ ) was purchased from Damas-beta (Shanghai, China).  $\text{AgNO}_3$  (analytical reagent >99.8%) was bought from Beijing HWRK Company (Beijing, China). Nitro blue tetrazolium chloride (NBT) was obtained by Tokyo Chemical Industry Co., Ltd. (Tokyo, Japan). Luminol (> 98.0%) was supplied from Tokyo Chemical Industry Co., Ltd. (Tokyo, Japan). All the above reagents were used without further treatment.

**Preparation of CoAl/LDHs on indium tin oxide (ITO) electrodes.** ITO electrodes with the size of  $1 \times 2 \text{ cm}^2$  were firstly activated in ethanol and water under ultrasonic treatment for 15 minutes. The CoAl/LDHs was synthesized on ITO electrodes through a one-pot hydrothermal method according to the previous report with slight modification.<sup>1</sup> Briefly,  $\text{Co}(\text{NO}_3)_2 \cdot 6\text{H}_2\text{O}$  (0.165 mmol),  $\text{Al}(\text{NO}_3)_3 \cdot 9\text{H}_2\text{O}$  (0.55 mmol),  $\text{NH}_4\text{F}$  (0.8 mmol) and urea (2.0 mmol) were dissolved in 16.0 mL of deionized water and then transferred to a 25 mL Teflon-lined stainless steel autoclave. Next, the treated electrodes were placed vertically in the autoclave, and the CoAl/LDHs were prepared on the ITO electrodes. The hydrothermal reaction was carried out at  $120 \text{ }^\circ\text{C}$  for 6 hours. After cooling to the room temperature, the electrodes with deposited CoAl/LDHs (labelled as LDH/ITO) were washed with deionized water and dried in air, and the acuiqred LDH/ITO was employed as the working electrode.

**Preparation of LDH/ITO-supported single atoms.** Electrodeposition method was employed to immobilize single atoms onto CoAl/LDH support.<sup>2</sup> Taking  $\text{Ag}^s/\text{LDH}/\text{ITO}$  as an example, a typical three-electrode system was employed. Briefly, LDH/ITO, Ag/AgCl and Pt electrodes were used as working electrode, reference electrode and counter electrode, respectively. The working electrolyte was 100.0 mL of KOH aqueous solution (1.2 mol/L), containing 0.1 mmol/L  $\text{AgNO}_3$  as the precursor for Ag species. The electrochemical depositions were carried out by cycling the potentials from  $-0.556$  to  $-0.156 \text{ V}$  with a scanning rate of  $50 \text{ mV s}^{-1}$  under

stirring for 2 cycles, and the stirring rate was set as 600 r/min. After washing with deionized water, the Ag single atoms were localized onto the LDH/ITO electrodes and marked as Ag<sup>s</sup>/LDH/ITO.

Similarly, Au<sup>s</sup>/LDH/ITO, Cu<sup>s</sup>/LDH/ITO and Fe<sup>s</sup>/LDH/ITO were prepared through the electrodeposition method taking HAuCl<sub>4</sub>·xH<sub>2</sub>O, FeCl<sub>3</sub> and CuCl<sub>2</sub> as the metal precursors, respectively. The working electrolyte contained 100 μmol/L metal precursor and 1.2 mol/L KOH.

**Preparation of controlled samples on ITO electrodes.** To prepare Au or Ag nanoparticles, electrodeposition of 30 cycles were employed. In detail, Ag<sup>np</sup>/ITO and Au<sup>np</sup>/ITO electrodes were acquired through the electrodeposition on bare ITO electrodes in KOH aqueous solution (1.2 mol/L) containing 0.1 mmol/L AgNO<sub>3</sub> or 0.1 mmol/L HAuCl<sub>4</sub>·xH<sub>2</sub>O, respectively. Similarly, the Ag or Au nanoparticles were immobilized on the LDH/ITO electrodes under the same condition of electrodeposition to acquire Ag<sup>np</sup>/LDH/ITO and Au<sup>np</sup>/LDH/ITO samples.

**Electrochemical and electrochemiluminescence measurements.** A CHI660E electrochemical workstation was used to perform the electrochemical experiments in a traditional three-electrode system with Pt, Ag/AgCl and modified ITO as counter electrode, reference electrode and the working electrode. The effective surface area of the working electrode was measured as 1 × 1

cm<sup>2</sup> during the electrochemical deposition and ECL measurements. Cyclic voltammetry (CV) curves were recorded in 6.0 mL of 0.01 mmol luminol (phosphate-buffered saline, PBS, pH = 7.5) in a potential range from -0.8 to +0.8 V at a scan rate of 0.1 V/s. Real-time electrochemiluminescence (ECL) signals were collected by a biophysics chemiluminescence analyzer (Institute of Biophysics, Chinese Academy of Sciences, Beijing, China) with the voltage of the photomultiplier tube at -900 V. The  $I_{\text{ECL}}$ -potential curves were obtained based on the combination of the CV signal from CHI660E electrochemical workstation and ECL signal collected by a biophysics CL analyzer. The ECL emission spectra were acquired by an F-7000 fluorescence spectrophotometer (Hitachi, Tokyo, Japan) coupled with CHI660E. Electrochemical impedance spectroscopy (EIS) measurements were carried out from 0.1 Hz to 100 kHz in 5.0 mmol/L K<sub>3</sub>[Fe(CN)<sub>6</sub>]/K<sub>4</sub>[Fe(CN)<sub>6</sub>] (0.1 mol/L KCl). The linear sweep voltammetry (LSV) curves were recorded at different rotation rates in O<sub>2</sub>-saturated 0.1 mol/L PBS (pH = 7.5) from 0 V to -1.2 V with a sweeping rate of 5 mV/s.

The identification of radicals during the ECL reaction were studied by a radical trapping experiment. Briefly, 70  $\mu$ L of NaN<sub>3</sub>, IPA and BQ (0.02 mol/L) solution were added to 6.0 mL of 0.01 mmol/L luminol to capture singlet oxygen (<sup>1</sup>O<sub>2</sub>), superoxide radical (O<sub>2</sub><sup>•-</sup>), and hydroxyl radical (OH<sup>•</sup>), respectively. O<sub>2</sub><sup>•-</sup> was semi-quantitatively analyzed by the trapping experiment of NBT. 100  $\mu$ L of NBT (20  $\mu$ mol/L) was added to the luminol electrolyte, and scans in the range of -0.8 to +0.8 V were performed for 10 times to produce O<sub>2</sub><sup>•-</sup>. The resulting electrode was

dissolved in 10 mL of 0.5% KOH-dimethyl sulfoxide solution for UV-vis adsorption measurement.

**Sample characterization.** X-ray diffraction (XRD) patterns for the samples were recorded with a 2500VB2 (Rigaku Corporation, Japan) using a Cu K $\alpha$  (radiation  $\lambda = 1.541\ 844\ \text{\AA}$ ) ranging from 3° to 90° under a scanning rate of 5°/min. X-ray photoelectron spectroscopy (XPS) and ultraviolet photoelectron spectroscopy (UPS) measurements were implemented using an ESCALAB-MKII 250 (Thermo, Waltham, U.S.A.) with an Al K as exciting source. Scanning electron microscopy (SEM) images were taken on a JSM-7800F (Japan Electron Optics Laboratory Co., Ltd.) scanning electron microscope. High-resolution transmission electron microscopy (HRTEM) images were obtained with a JEM-ARM200F (Japan Electron Optics Laboratory Co., Ltd.). The morphologies of Au and Ag nanoparticles were studied by TEM 2100 (Japan Electron Optics Laboratory Co., Ltd.). High-angle annular dark-field scanning transmission electron microscopy (HAADF-STEM) was performed on a JEOL JEM-ARM200F equipped with double aberration correctors and a cold field emission gun. The mass loadings of samples on the modified electrodes were analyzed by inductively coupled plasma optical emission spectrometry (ICP-OES, Thermo Fisher Scientific, U.S.A.). UV-vis absorption spectra were acquired by a UV-3900H (Shimadzu, Tokyo, Japan) spectrophotometer. Temperature-programmed desorption (TPD) was performed on a micromeritics chemisorb 2750



chemisorption instrument (ChemBET Pulsar, USA) with a thermal conductivity detector. The samples of 0.1000 g were preheated in a gas stream (10% oxygen and 90% helium) at 120 °C for 1 h. After cooling to the room temperature, the samples were kept in the same gas stream for 1 h to ensure saturated adsorption and then purged with a helium stream for another 1 h. The O<sub>2</sub>-TPD curve was collected by ramping the temperature from 30 °C to 950 °C with helium flow as the carrier gas (40 mL/min).

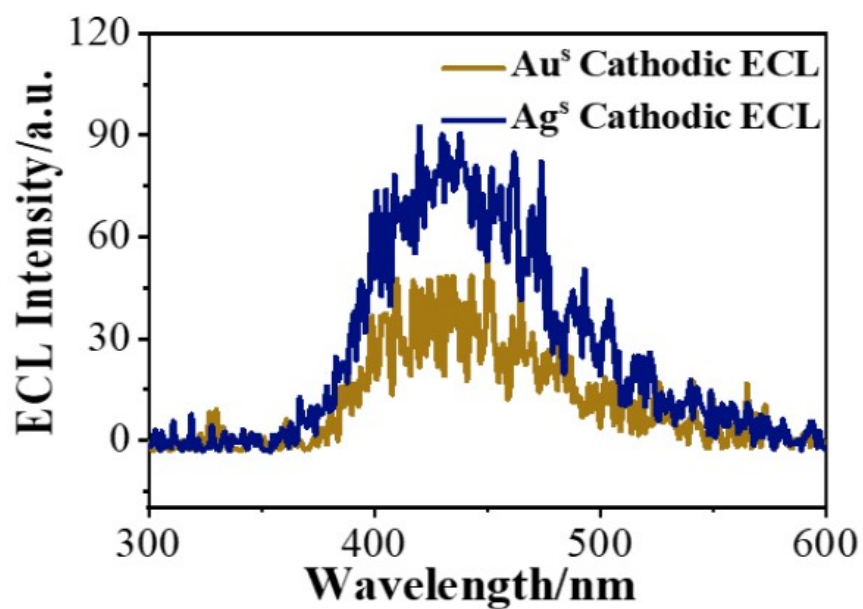

**Fig. S1** Cathodic electrochemiluminescence (ECL) spectra at Ag<sup>s</sup>/LDH/ITO or Au<sup>s</sup>/LDH/ITO electrode in 0.01 mmol/L luminol (PBS, pH = 7.5).

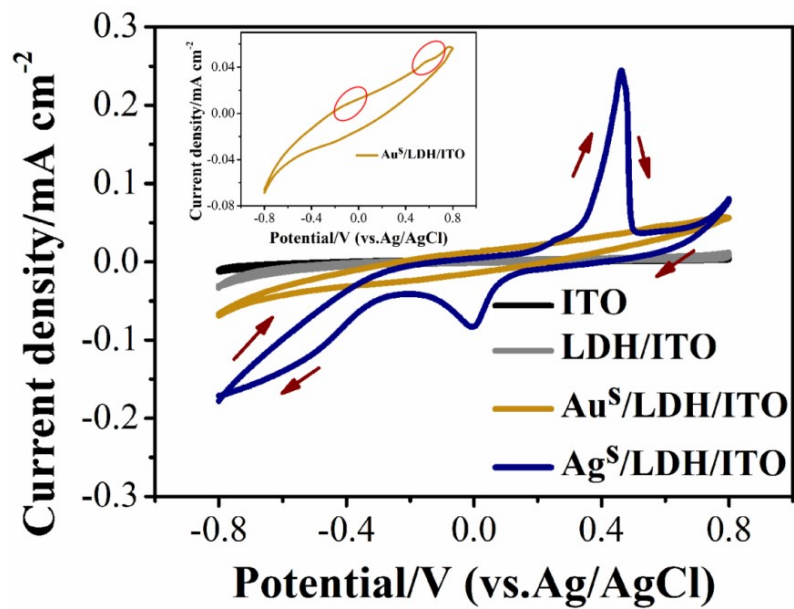

**Fig. S2** Current density-voltammetry curves in 0.01 mmol/L luminol (PBS, pH = 7.5) at ITO, LDH/ITO, Au<sup>S</sup>/LDH/ITO and Ag<sup>S</sup>/LDH/ITO electrodes.

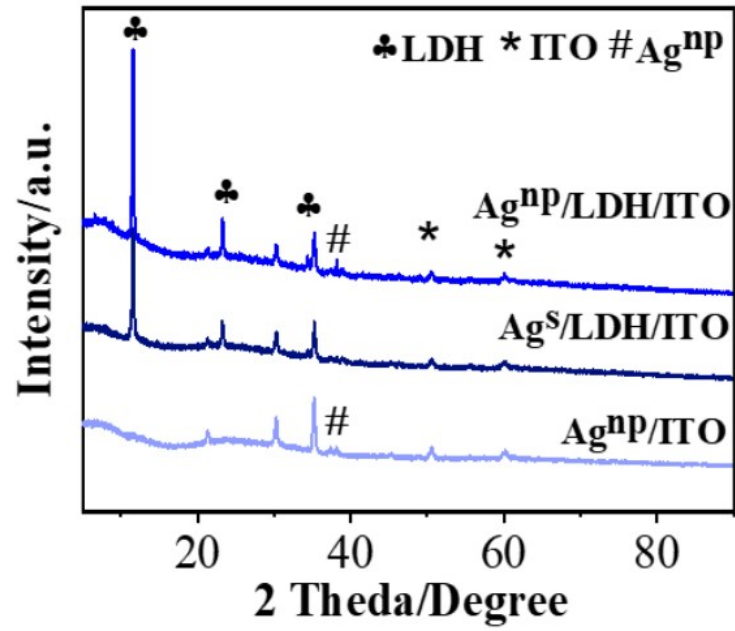

**Fig. S3** X-ray diffraction (XRD) patterns of Ag<sup>np</sup>/LDH/ITO, Ag<sup>s</sup>/LDH/ITO and Ag<sup>np</sup>/ITO samples.

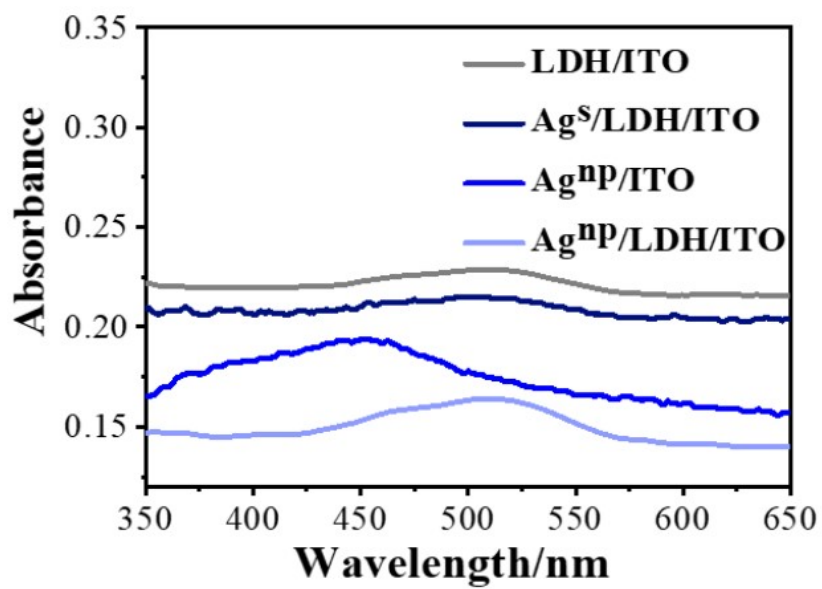

**Fig. S4** UV-vis absorption spectra of LDH/ITO, Ag<sup>np</sup>/ITO, Ag<sup>np</sup>/LDH/ITO and Ag<sup>s</sup>/LDH/ITO samples.

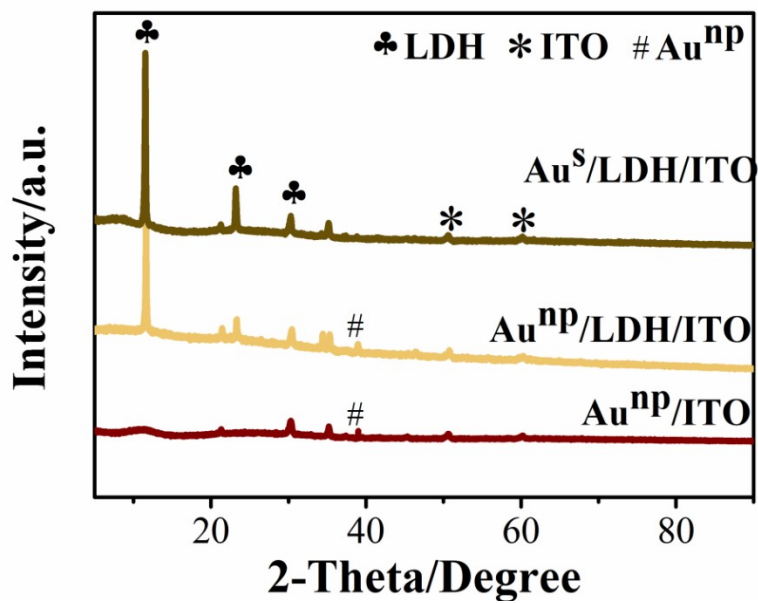

Fig. S5 XRD patterns of Au<sup>S</sup>/LDH/ITO, Au<sup>np</sup>/LDH/ITO and Au<sup>np</sup>/ITO samples.

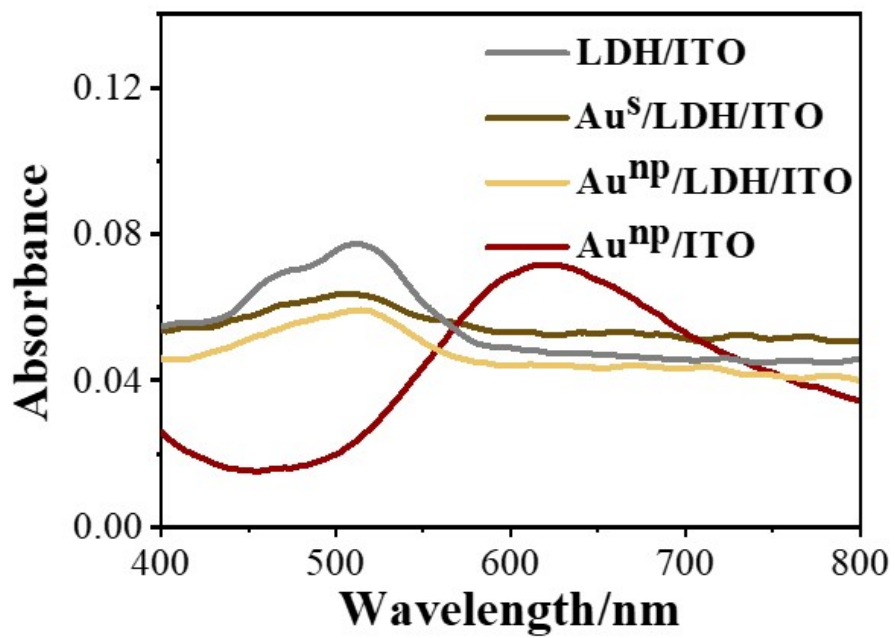

**Fig. S6** UV-vis absorption spectra of Au<sup>s</sup>/LDH/ITO, Au<sup>np</sup>/ITO, Au<sup>np</sup>/LDH/ITO and LDH/ITO samples.

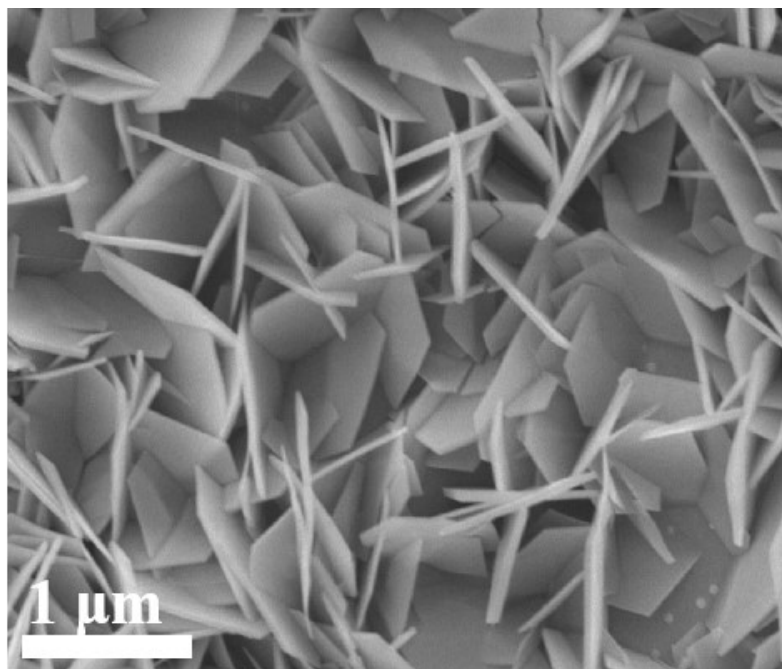

**Fig.S7** Scanning electron microscopy (SEM) image of CoAl/LDH deposited on ITO electrode.



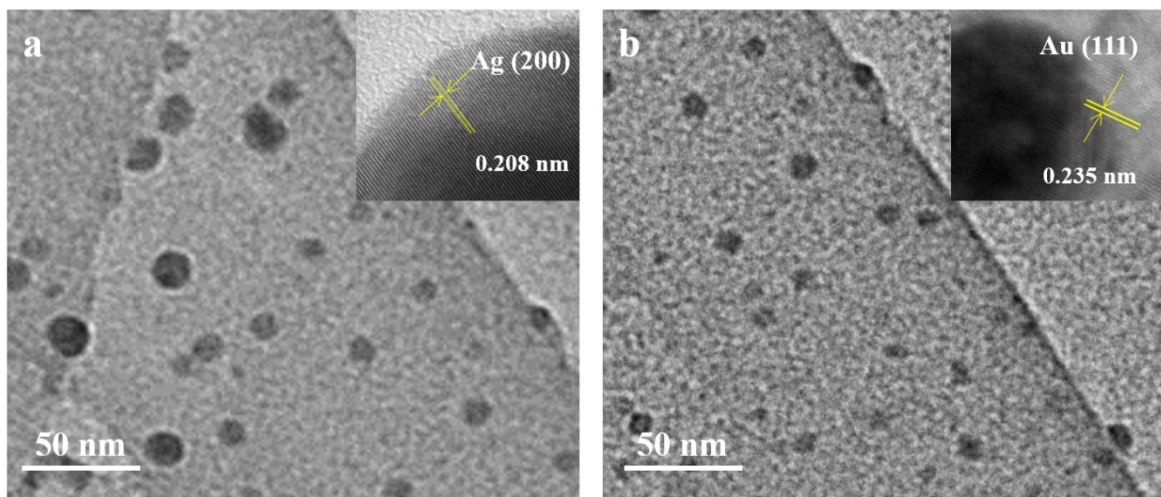

**Fig. S8** Transmission electron microscopy (TEM) images and the high-resolution TEM images (insets) of (a) Ag<sup>np</sup>/LDH/ITO and (b) Au<sup>np</sup>/LDH/ITO.

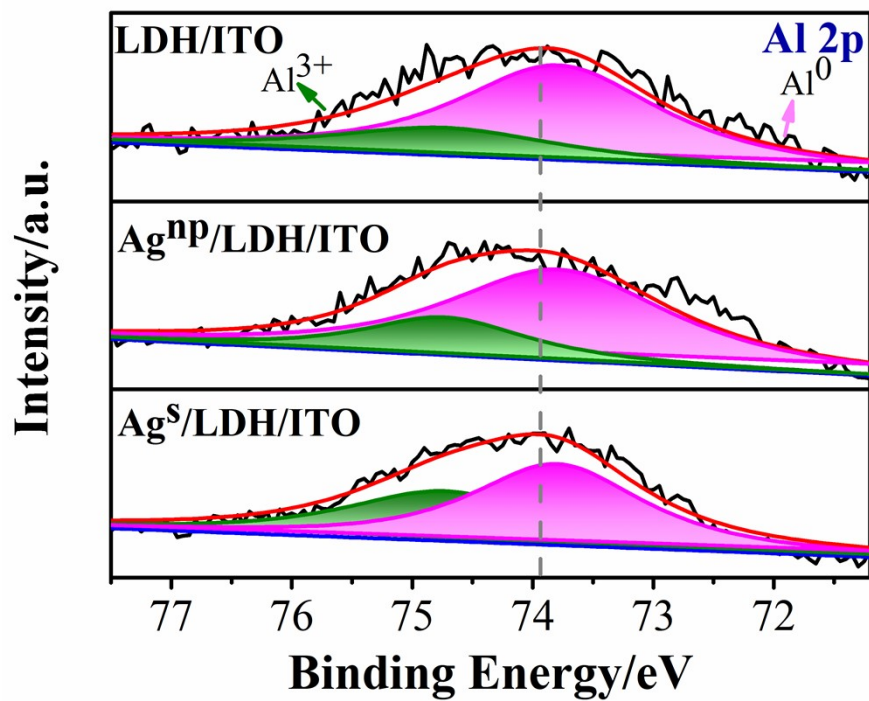

**Fig. S9** X-ray photoelectron spectroscopy (XPS) spectra of Al 2p for LDH/ITO, Ag<sup>np</sup>/LDH/ITO and Ag<sup>s</sup>/LDH/ITO.

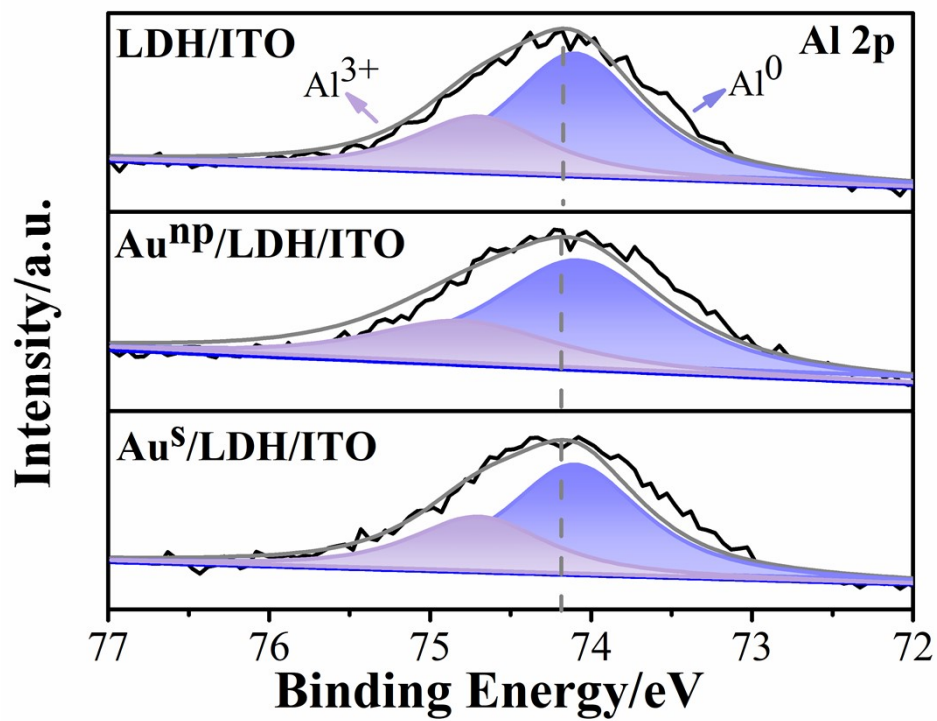

Fig. S10 XPS spectra of Al 2p for LDH/ITO, Au<sup>np</sup>/LDH/ITO and Au<sup>s</sup>/LDH/ITO.

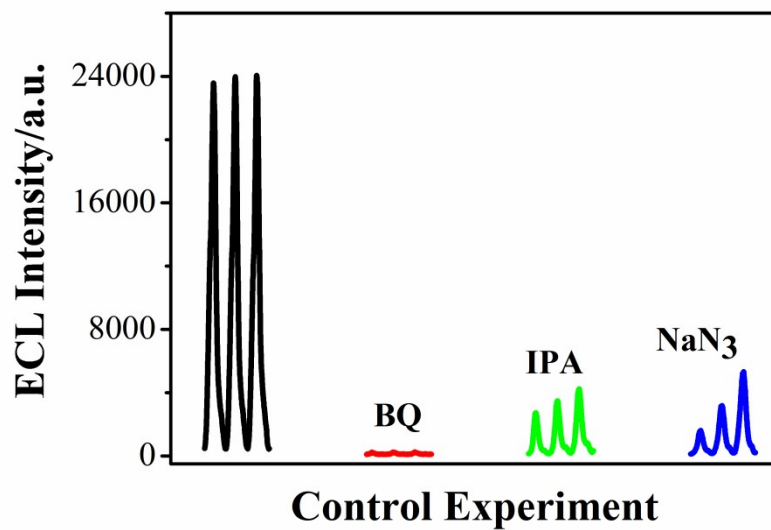

**Fig. S11** ECL intensities at Ag<sup>s</sup>/LDH/ITO electrode in the absence (black lines) or presence of *p*-Benzoquinone (BQ, red lines), isopropyl alcohol (IPA, green lines), and NaN<sub>3</sub> (blue lines) as radical scavengers, respectively (the potential ranged from -0.8 V to 0 V).

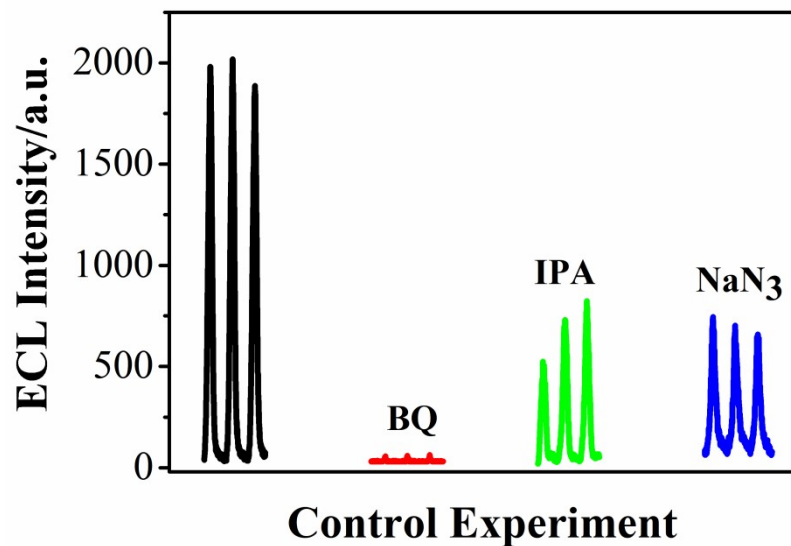

**Fig. S12** ECL intensities at Au<sup>s</sup>/LDH/ITO electrode in the absence (black lines) or presence of *p*-BQ (red lines), IPA (green lines), and NaN<sub>3</sub> (blue lines) as radical scavengers, respectively (the potential ranged from -0.8 V to 0 V).

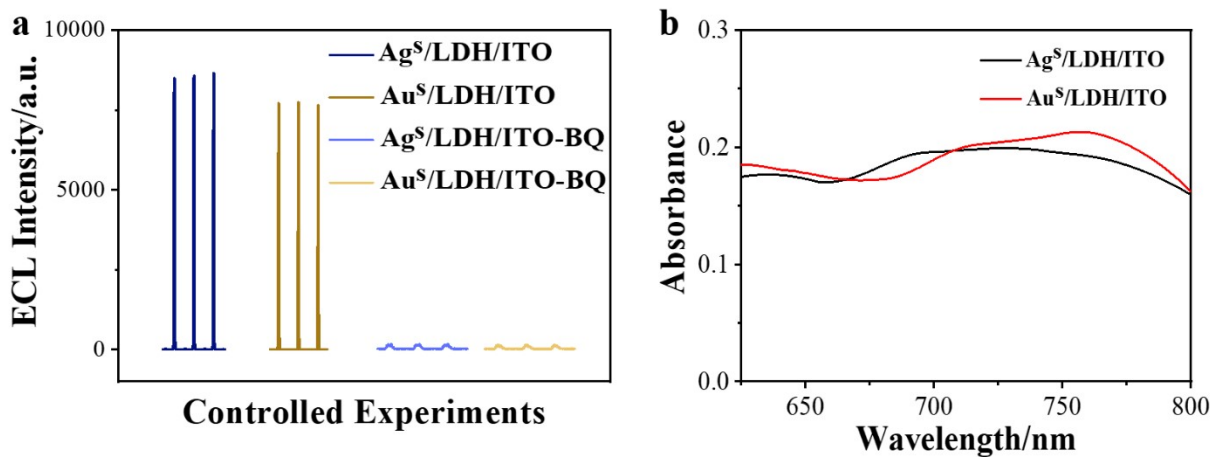

**Fig. S13** (a) ECL intensities at Ag<sup>s</sup>/LDH/ITO and Au<sup>s</sup>/LDH/ITO electrodes in the absence or presence of *p*-BQ as radical scavengers, and (b) UV-vis spectra of NBT for the Ag<sup>s</sup>/LDH/ITO and Au<sup>s</sup>/LDH/ITO electrodes in KOH/DMSO solutions (the potential ranged from 0 V to +0.8 V).

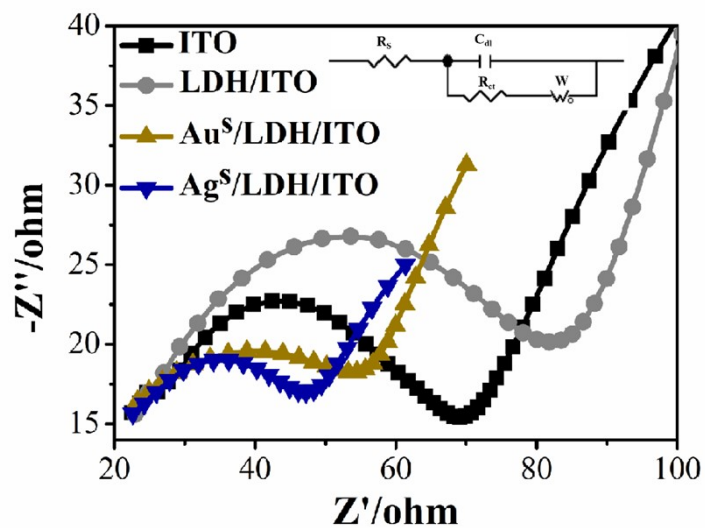

**Fig. S14** Electrochemical impedance spectroscopy (EIS) results for ITO, LDH/ITO, Au<sup>S</sup>/LDH/ITO and Ag<sup>S</sup>/LDH/ITO electrodes, and the inset showed the equivalent circuit ( $R_s$ ,  $R_{ct}$ ,  $C_{dl}$ , and  $W$  represented the resistance of solution, charge transfer resistance, double layer capacitance, and the Warburg constant, respectively).

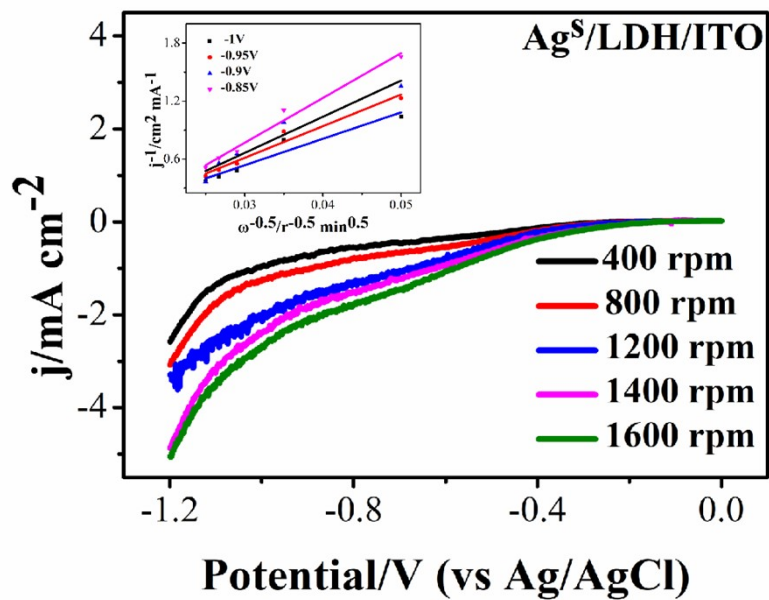

**Fig. S15** Linear sweep voltammetry (LSV) curves of Ag<sup>s</sup>/LDH/ITO electrode in O<sub>2</sub>-saturated PBS (pH = 7.5) solution at different rotation rates (the inset showed the K-L plots of  $j^{-1}$  vs.  $\omega^{-1/2}$  at different potentials).



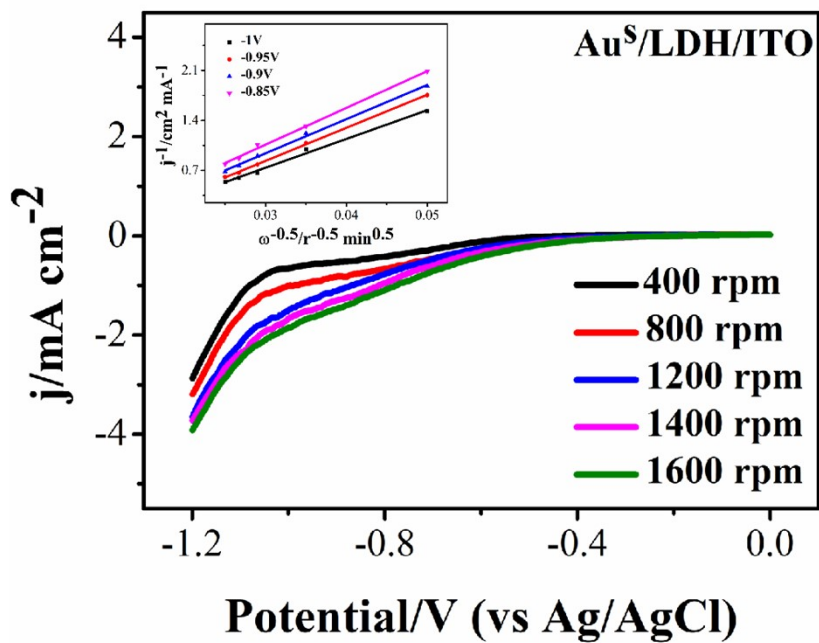

**Fig. S16** LSV curves of Au<sup>S</sup>/LDH/ITO electrode in O<sub>2</sub>-saturated PBS (pH = 7.5) solution at different rotation rates (the inset showed the K-L plots of  $j^{-1}$  vs.  $\omega^{-1/2}$  at different potentials).

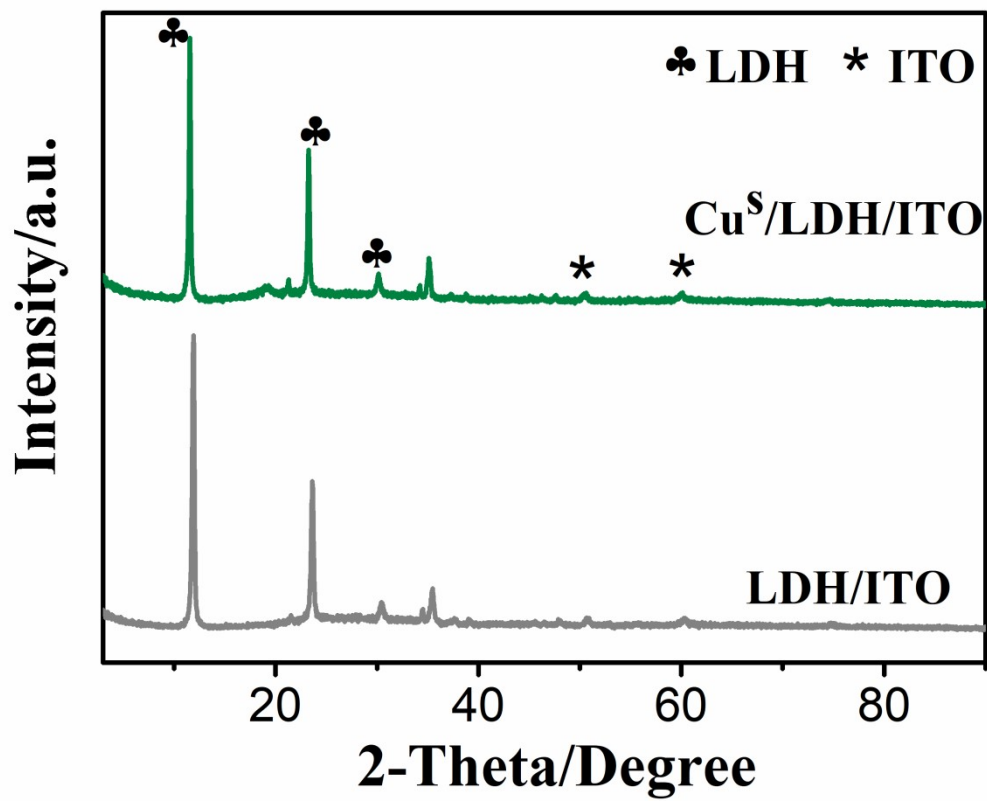

**Fig. S17** XRD patterns of  $\text{Cu}^{\text{S}}/\text{LDH}/\text{ITO}$  and LDH/ITO samples (absence of Cu nanoparticles at 50°).

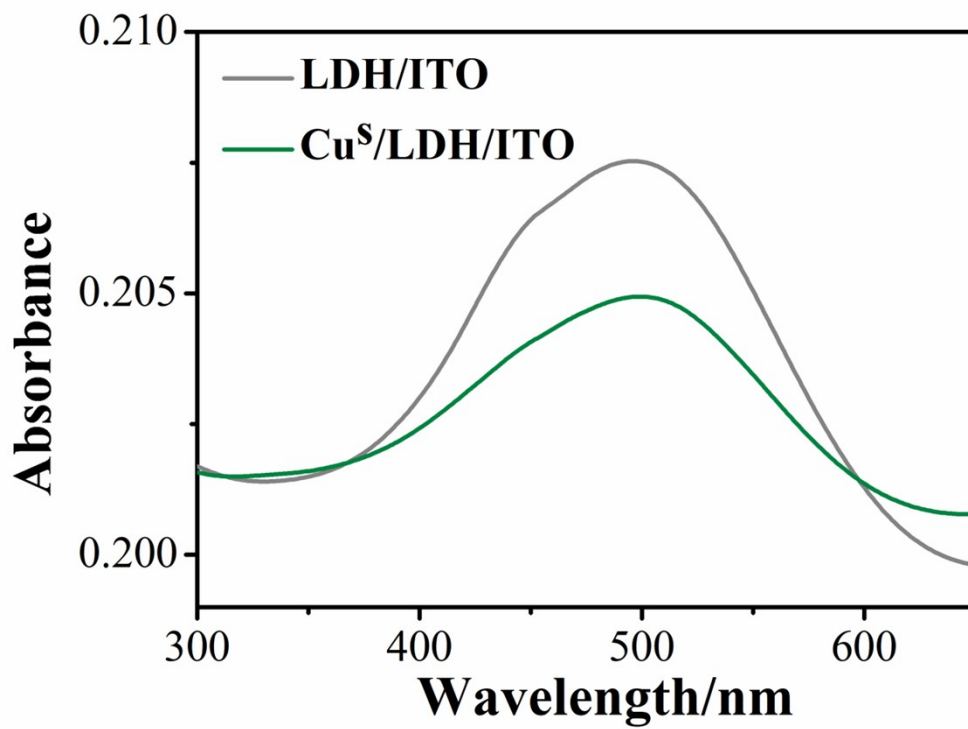

**Fig. S18** UV-vis absorption spectra of Cu<sup>s</sup>/LDH/ITO and LDH/ITO samples (absence of Cu nanoparticles at 330 nm).

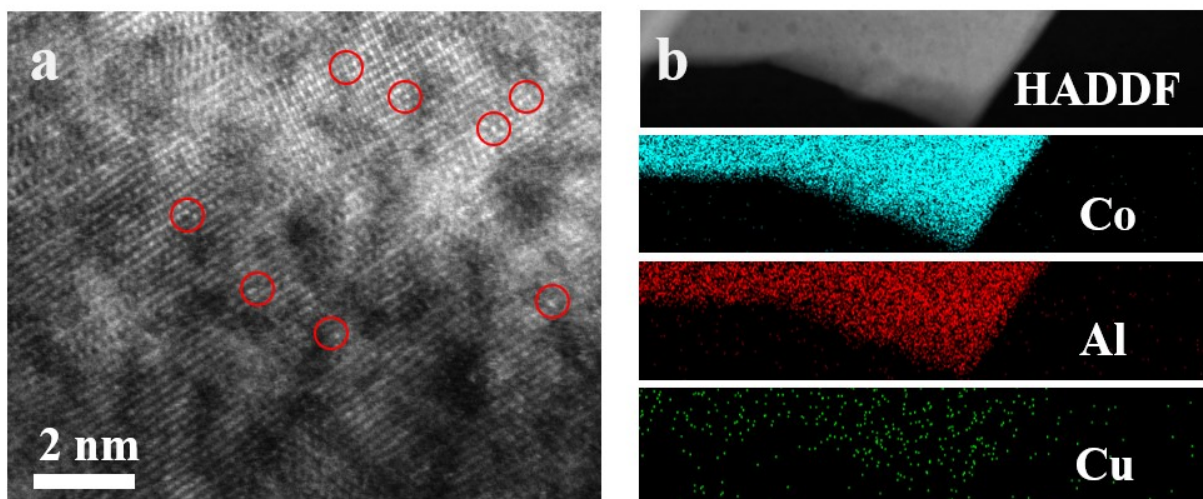

**Fig. S19** (a) HAADF-STEM image and (b) STEM-EDS mapping images of Co, Al, and Cu for Cu<sup>s</sup>/LDH/ITO.

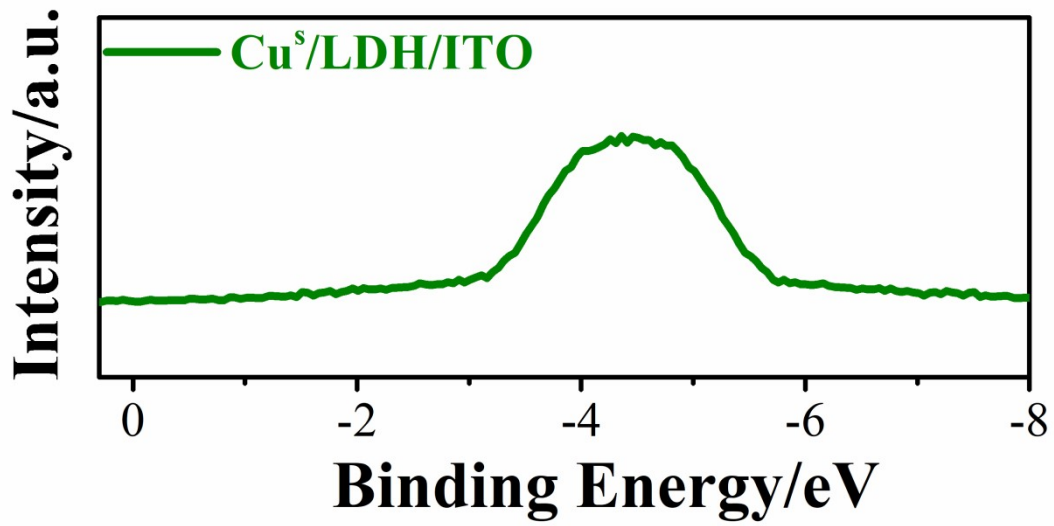

**Fig. S20** Ultraviolet photoelectron spectroscopy (UPS) valence-band spectra of Cu<sup>s</sup>/LDH/ITO.

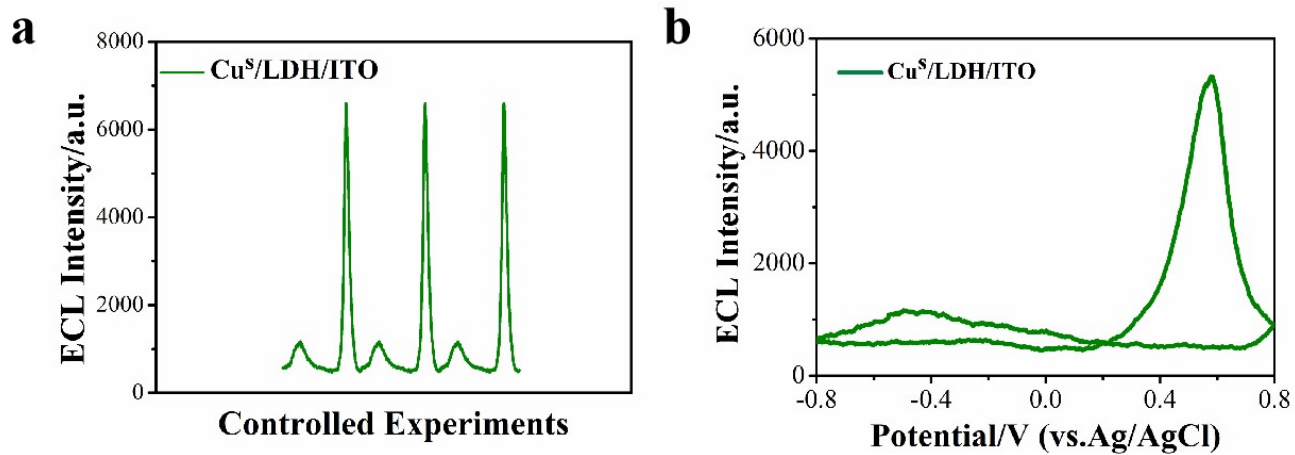

**Fig. S21** (a)  $I_{\text{ECL}}$ -intensities and (b)  $I_{\text{ECL}}$ -potential curves for Cu<sup>s</sup>/LDH/ITO sample.

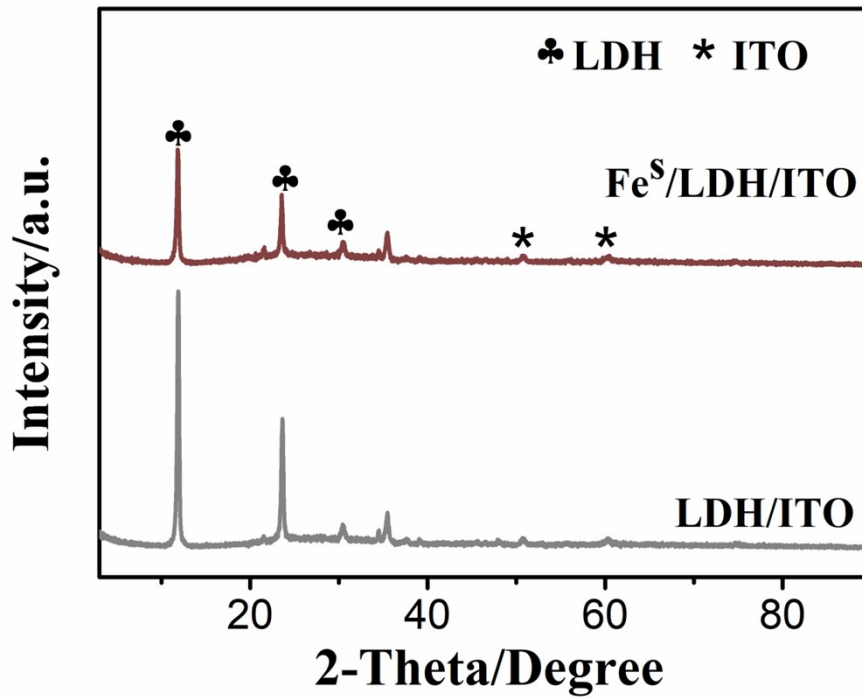

**Fig. S22** XRD patterns of Fe<sup>S</sup>/LDH/ITO and LDH/ITO samples (absence of Fe nanoparticles at 45°).

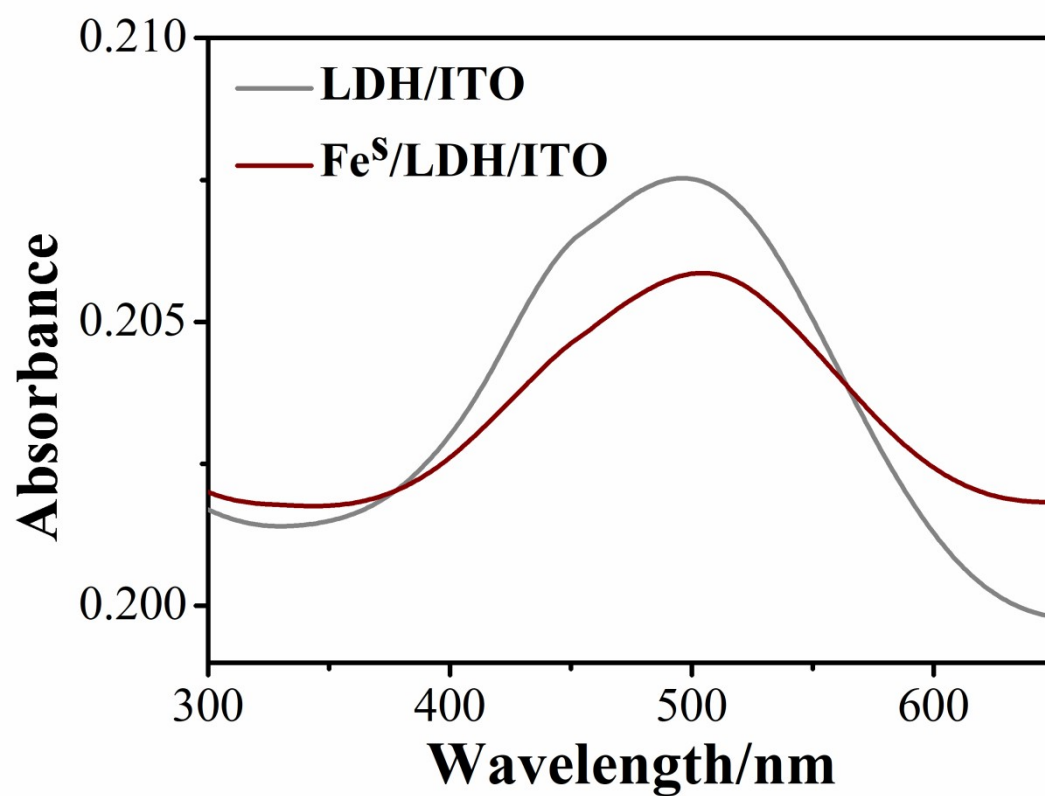

**Fig. S23** UV-vis absorption spectra of Fe<sup>S</sup>/LDH/ITO and LDH/ITO samples (absence of Fe nanoparticles at 400 nm).



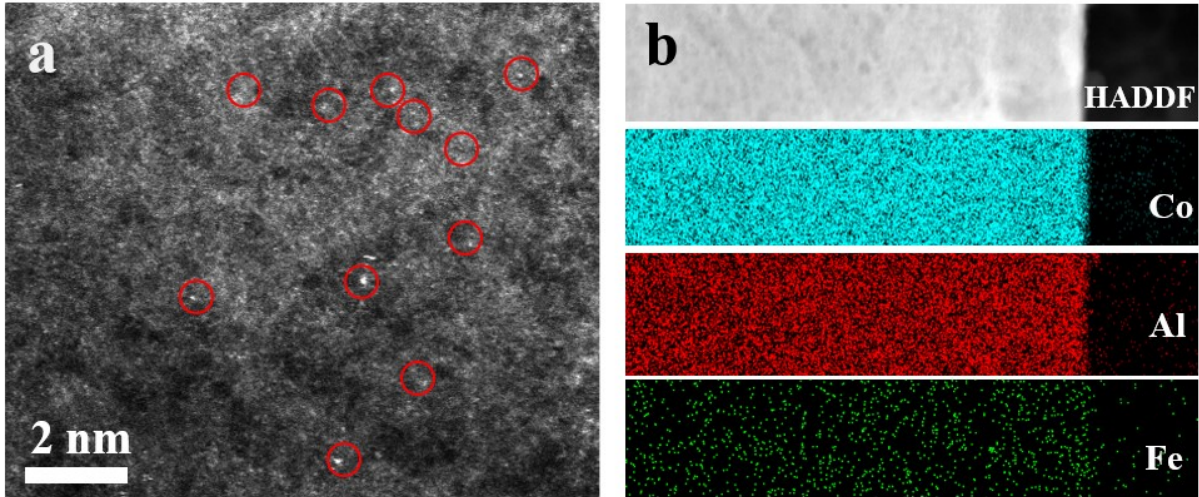

**Fig. S24** (A) HAADF-STEM image and (B) STEM-EDS mapping images of Co, Al, and Fe for  $\text{Fe}^s/\text{LDH}/\text{ITO}$ .

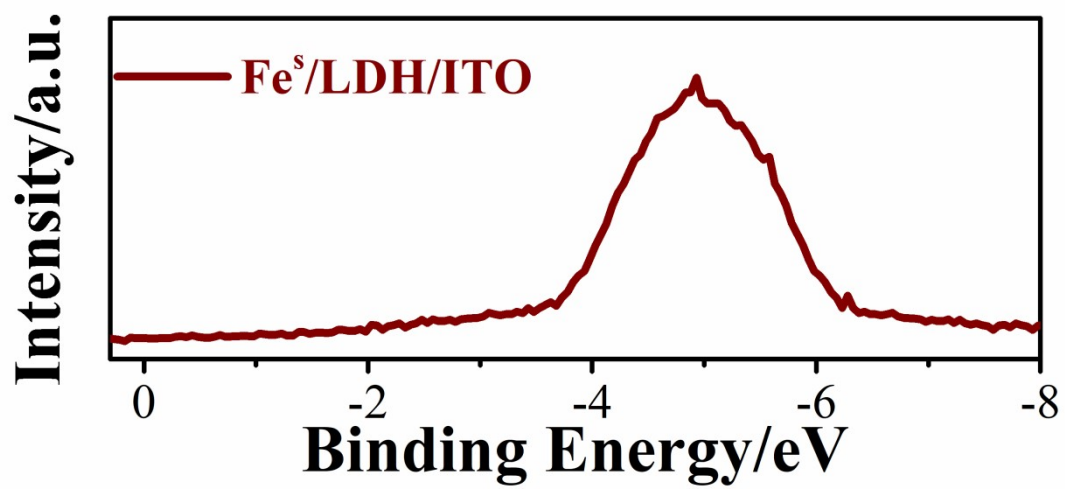

**Fig. S25** UPS valence-band spectra of Fe<sup>s</sup>/LDH/ITO.

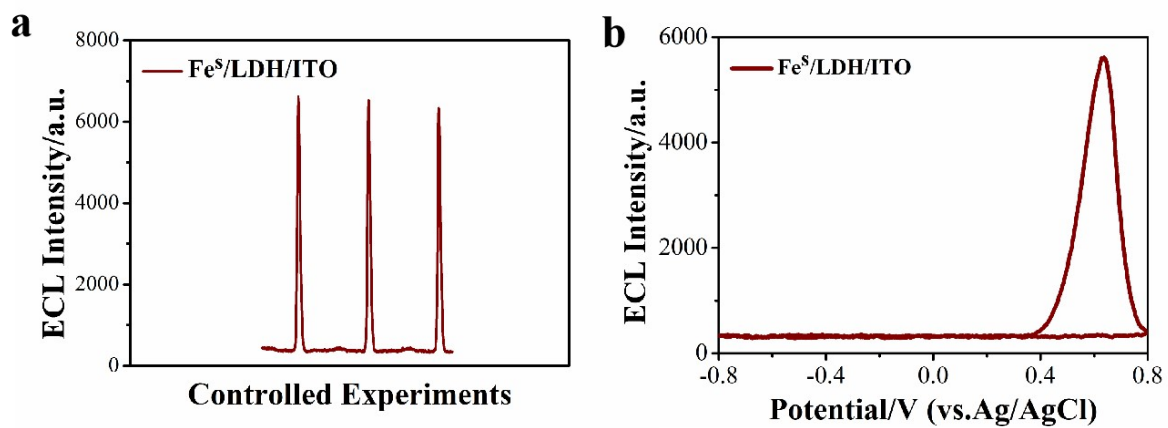

**Fig. S26** (a)  $I_{\text{ECL}}$ -intensities and (b)  $I_{\text{ECL}}$ -potential curves for Fe<sup>s</sup>/LDH/ITO sample.

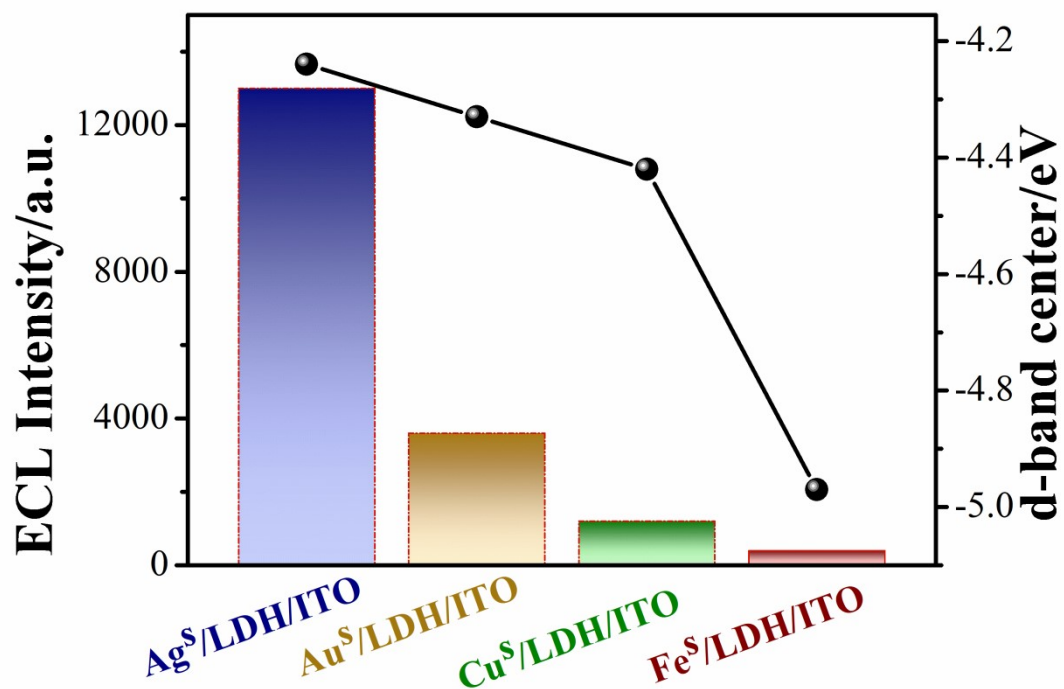

**Fig. S27** Correlation between the d-band centers and ECL intensities of Ag<sup>s</sup>/LDH/ITO, Au<sup>s</sup>/LDH/ITO, Cu<sup>s</sup>/LDH/ITO and Fe<sup>s</sup>/LDH/ITO electrodes (ECL measurements were performed 0.01 mmol/L luminol, PBS, pH = 7.5).

**The reaction of cathodic luminol ECL:**

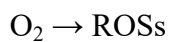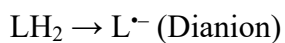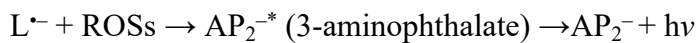

**The reaction of anodic luminol ECL:**

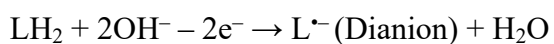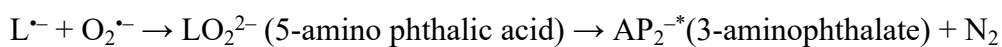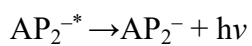

**Scheme S1.** ECL mechanism of luminol catalyzed by the single-atom catalysts.

**Table S1** Peak positions and  $\text{Co}^{3+}/\text{Co}^{2+}$  ratios of Co 2p in XPS spectra for LDH/ITO,  $\text{Ag}^{\text{np}}/\text{LDH}/\text{ITO}$ ,  $\text{Au}^{\text{np}}/\text{LDH}/\text{ITO}$ ,  $\text{Ag}^{\text{s}}/\text{LDH}/\text{ITO}$  and  $\text{Au}^{\text{s}}/\text{LDH}/\text{ITO}$ .

|                                               | <b>Valence state</b> | <b>Peak position (eV)</b> | <b>Relative contents (%)</b> | <b><math>\text{Co}^{3+}/\text{Co}^{2+}</math> (%)</b> |
|-----------------------------------------------|----------------------|---------------------------|------------------------------|-------------------------------------------------------|
| LDH/ITO                                       | $\text{Co}^{3+}$     | 783.7/798.8               | 23.3                         | 71.9                                                  |
|                                               | $\text{Co}^{2+}$     | 781.3/797.2               | 32.4                         |                                                       |
| $\text{Ag}^{\text{np}}/\text{LDH}/\text{ITO}$ | $\text{Co}^{3+}$     | 783.6/798.4               | 36.3                         | 70.3                                                  |
|                                               | $\text{Co}^{2+}$     | 780.4/796.5               | 51.6                         |                                                       |
| $\text{Ag}^{\text{s}}/\text{LDH}/\text{ITO}$  | $\text{Co}^{3+}$     | 783.2/798.1               | 17.6                         | 40.6                                                  |
|                                               | $\text{Co}^{2+}$     | 780.3/796.4               | 43.3                         |                                                       |
| $\text{Au}^{\text{np}}/\text{LDH}/\text{ITO}$ | $\text{Co}^{3+}$     | 783.6/798.7               | 26.4                         | 68.4                                                  |
|                                               | $\text{Co}^{2+}$     | 780.9/797.0               | 38.6                         |                                                       |
| $\text{Au}^{\text{s}}/\text{LDH}/\text{ITO}$  | $\text{Co}^{3+}$     | 783.5/798.2               | 26.3                         | 65.4                                                  |
|                                               | $\text{Co}^{2+}$     | 780.6/796.5               | 40.2                         |                                                       |

**Table S2** Information and calculation of the average oxidation states for Ag<sup>s</sup>/LDH/ITO and Au<sup>s</sup>/LDH/ITO.

| Samples                  | Valence states | Integrated area | C%  |
|--------------------------|----------------|-----------------|-----|
| Ag <sup>s</sup> /LDH/ITO | Ag (0)         | 421.643         | 10% |
|                          | Ag (I)         | 3794.758        | 90% |
| Au <sup>s</sup> /LDH/ITO | Au (0)         | 963.834         | 27% |
|                          | Au (I)         | 2605.922        | 73% |

The calculations of the average oxidation states for single atomic Ag and Au were carried out according to the following equations:<sup>3</sup>

$$\text{Au}_{\text{oxidation state}} = C\% \text{Au(I)} \times 1 + C\% \text{Au(0)} \times 0,$$

$$\text{Ag}_{\text{oxidation state}} = C\% \text{Ag(I)} \times 1 + C\% \text{Ag(0)} \times 0,$$

where C% stood for the proportion of the integrated area for the different valence states to the total area calculated from the quantitative peak deconvolution.

**Table S3** Peak positions and relative contents of O 1s in XPS spectra for LDH/ITO, Ag<sup>s</sup>/LDH/ITO and Au<sup>s</sup>/LDH/ITO.

|                          | <b>Oxygen species</b> | <b>Peak position (eV)</b> | <b>Relative contents (%)</b> |
|--------------------------|-----------------------|---------------------------|------------------------------|
| LDH/ITO                  | O <sub>H</sub>        | 533.8                     | 20.1                         |
|                          | O <sub>O</sub>        | 531.8                     | 68.5                         |
|                          | O <sub>lat</sub>      | 530.6                     | 11.4                         |
| Au <sup>s</sup> /LDH/ITO | O <sub>H</sub>        | 532.9                     | 10.7                         |
|                          | O <sub>O</sub>        | 531.4                     | 70.3                         |
|                          | O <sub>lat</sub>      | 530.5                     | 13.0                         |
|                          | Au–O                  | 532.0                     | 6.0                          |
| Ag <sup>s</sup> /LDH/ITO | O <sub>H</sub>        | 532.6                     | 7.3                          |
|                          | O <sub>O</sub>        | 531.3                     | 71.2                         |
|                          | O <sub>lat</sub>      | 530.4                     | 14.0                         |
|                          | Ag–O                  | 529.5                     | 7.5                          |



**Table S4** ECL intensity variations of Au<sup>s</sup>/LDH/ITO and Ag<sup>s</sup>/LDH/ITO electrodes in the presence of different scavengers.

| <b>Samples</b>               | <b>Radical scavengers</b> | <b>Target radicals</b>       | <b>ECL intensity before addition</b> | <b>ECL intensity after addition</b> | <b>Quenchi ng rates</b> |
|------------------------------|---------------------------|------------------------------|--------------------------------------|-------------------------------------|-------------------------|
| Au <sup>s</sup> /LDH/I<br>TO | BQ                        | O <sub>2</sub> <sup>•-</sup> | 2.0×10 <sup>3</sup>                  | 0.07×10 <sup>3</sup>                | 97%                     |
|                              | IPA                       | •OH                          | 1.9×10 <sup>3</sup>                  | 0.5×10 <sup>3</sup>                 | 74%                     |
|                              | NaN <sub>3</sub>          | <sup>1</sup> O <sub>2</sub>  | 1.8×10 <sup>3</sup>                  | 0.6×10 <sup>3</sup>                 | 67%                     |
| Ag <sup>s</sup> /LDH/I<br>TO | BQ                        | O <sub>2</sub> <sup>•-</sup> | 2.6×10 <sup>4</sup>                  | 0.2×10 <sup>3</sup>                 | 99%                     |
|                              | IPA                       | •OH                          | 2.3×10 <sup>4</sup>                  | 2.6×10 <sup>3</sup>                 | 89%                     |
|                              | NaN <sub>3</sub>          | <sup>1</sup> O <sub>2</sub>  | 2.4×10 <sup>4</sup>                  | 3.0×10 <sup>3</sup>                 | 87%                     |

## References

- 1 W. Shi, L. Bai, J. Guo and Y. Zhao, *RSC Adv.*, 2015, **5**, 89056-89061.
- 2 Z. Zhang, C. Feng, C. Liu, M. Zuo, L. Qin, X. Yan, Y. Xing, H. Li, R. Si, S. Zhou and J. Zeng, *Nat. Commun.*, 2020, **11**, 1215.
- 3 T. Kashyap, S. Biswasi, A. R. Pal and B. Choudhury, *ACS Sustain. Chem. Eng.*, 2019, **7**, 19295–19302.
